# Supplementary material for: A bottom-up reward pathway mediated by somatostatin neurons in the medial septum complex underlying appetitive learning
Source: PubMed Central journal article supplement (PMC8901785; doi:10.1038/s41467-022-28854-z), 2022-03-07
Supplement: 41467_2022_28854_MOESM1_ESM.pdf [file 41467_2022_28854_MOESM1_ESM.pdf]

## Supplementary Figures

### **A Bottom-up Reward Pathway Mediated by Somatostatin Neurons in the Medial Septum Complex Underlying Appetitive Learning**

Li Shen<sup>1, †</sup>, Guang-Wei Zhang<sup>1, †</sup>, Can Tao<sup>1</sup>, Michelle B. Seo<sup>1,2</sup>, Nicole K. Zhang<sup>1</sup>, Junxiang J. Huang<sup>1,3</sup>, Li I. Zhang<sup>1,4,\*</sup> & Huizhong W. Tao<sup>1,4,\*</sup>

<sup>1</sup>Zilkha Neurogenetic Institute, Keck School of Medicine, University of Southern California, 1501 San Pablo Street, Los Angeles, California 90033, USA;

<sup>2</sup>Neuroscience Graduate Program, University of Southern California, Los Angeles, California 90089, USA;

<sup>3</sup>Graduate Programs in Biomedical and Biological Science, Keck School of Medicine, University of Southern California, Los Angeles, California 90033, USA;

<sup>4</sup>Department of Physiology & Neuroscience, Keck School of Medicine, University of Southern California, 1501 San Pablo Street, Los Angeles, CA 90033, USA.

<sup>†</sup> Authors contributed equally to this work.

<sup>\*</sup> Correspondence should be addressed to: H.W.T ([htao@usc.edu](mailto:htao@usc.edu)) or L.I.Z ([liizhang@usc.edu](mailto:liizhang@usc.edu))

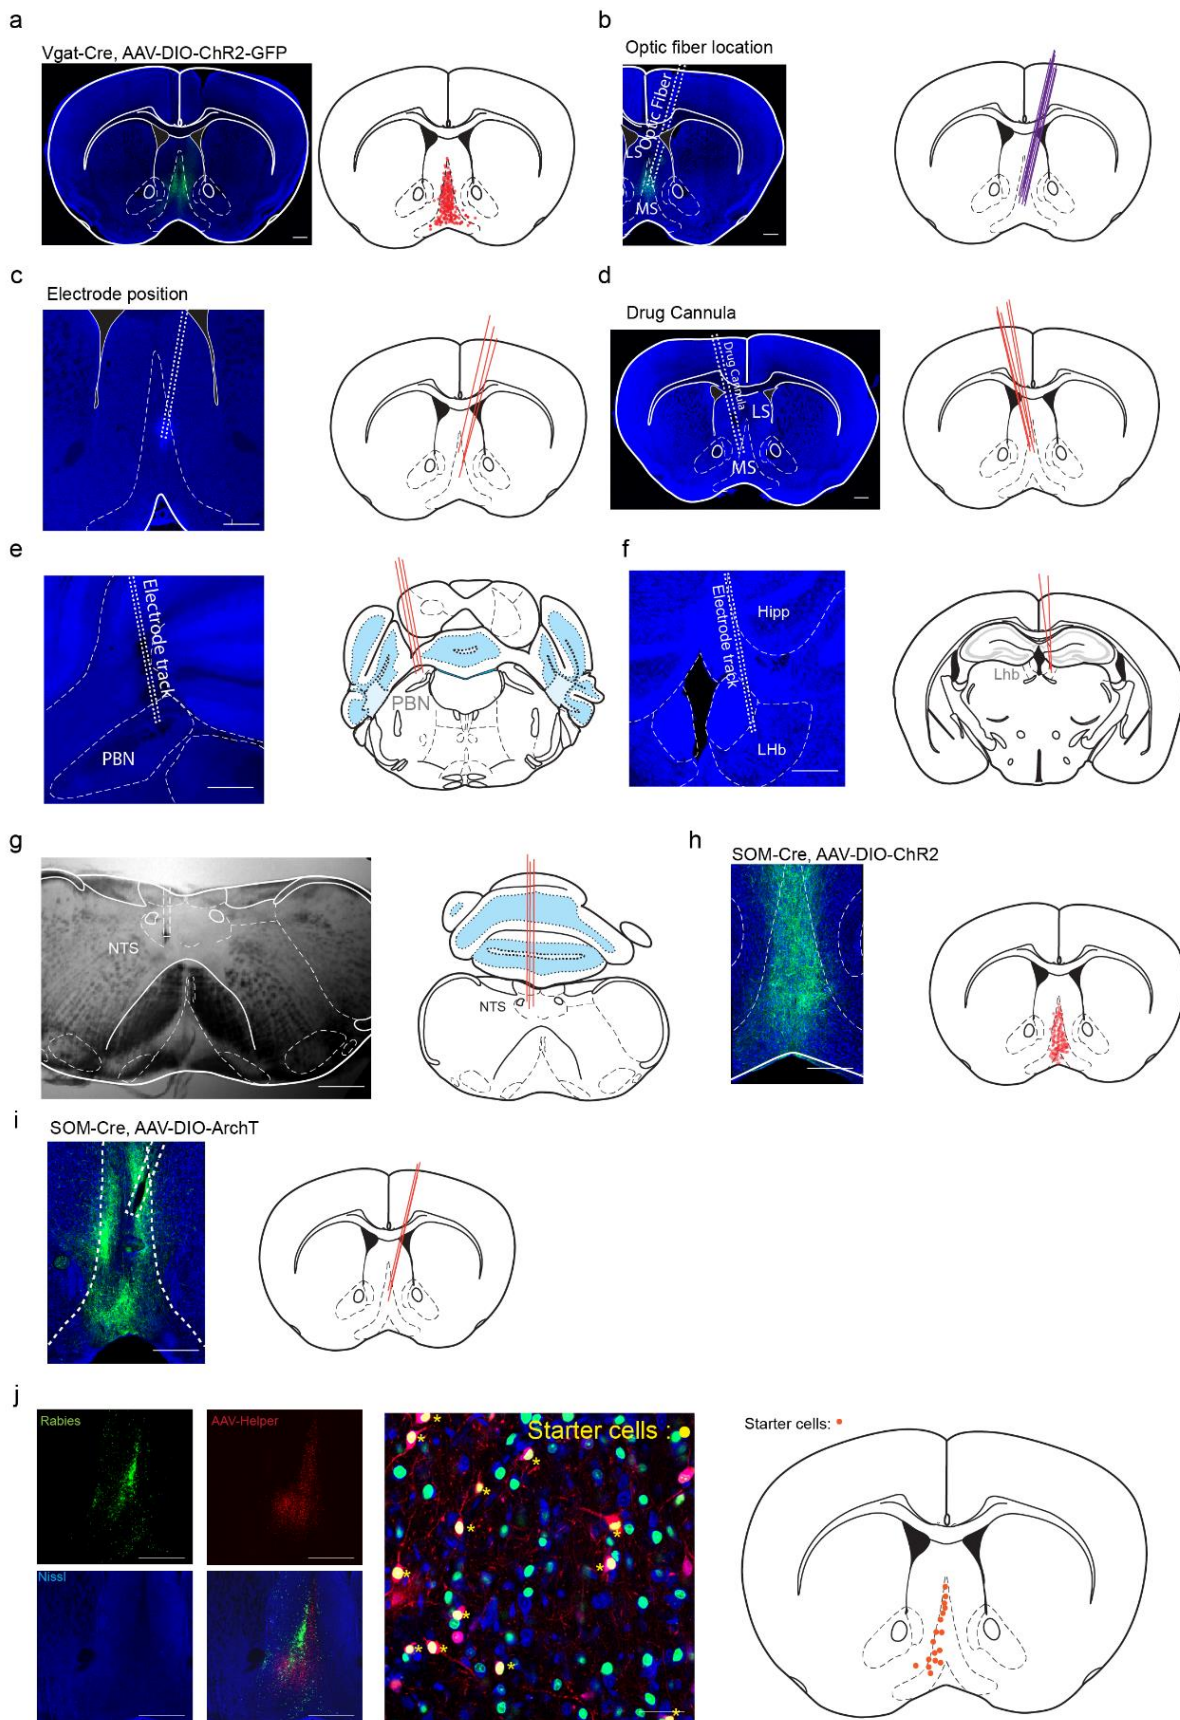

**Supplementary Figure 1 | Post hoc histological verifications of viral expression and placements of electrodes and optic fibers.**

**a**, An example coronal section showing the expression of ChR2-EYFP in a Vgat-Cre mouse. Right, superimposed ChR2-EYFP expressing cell locations across animals. Each small dot represents one cell (n = 7 mice). **b**, An example coronal section showing the track of the optic fiber implanted in a Vgat-Cre mouse expressing ChR2-EYFP. Right, superimposed tracks of optic fibers across experiments (n = 7 mice). **c**, An example coronal section showing the track of the optrode electrode in MS. Right, superimposed tracks of electrodes (n = 3 mice). Each line represents one track. **d**, An example coronal section showing the track of drug cannula in MS. Right, superimposed tracks of cannulas (n = 5 mice). **e**, An example coronal section showing the track of the electrode in PBN. Right, superimposed tracks of electrodes (n = 3 mice). **f**, An example coronal section showing the track of electrode in LHb. Right, superimposed tracks of electrodes (n = 2 mice). **g**, An example bright field image showing the track of electrode in NTS. Right, superimposed tracks of electrodes (n = 3 mice). **h**, An example coronal section showing the expression of ChR2-EYFP in a SOM-Cre mouse. Right, superimposed ChR2-EYFP expressing cell locations (n = 3 mice). **i**, An example coronal section showing the track of optic fiber implanted in a SOM-Cre mouse with ChR2-EYFP expression in MS. Right, superimposed tracks of electrodes (n = 3 mice). **j**, Images of pseudo-typed rabies virus expression (n = 3 mice). Yellow stars indicate starter cells which were transduced by both AAV-helper and pseudo-typed rabies virus. Right, superimposed starter cell locations. Scale bar: 500  $\mu$ m in all panels.

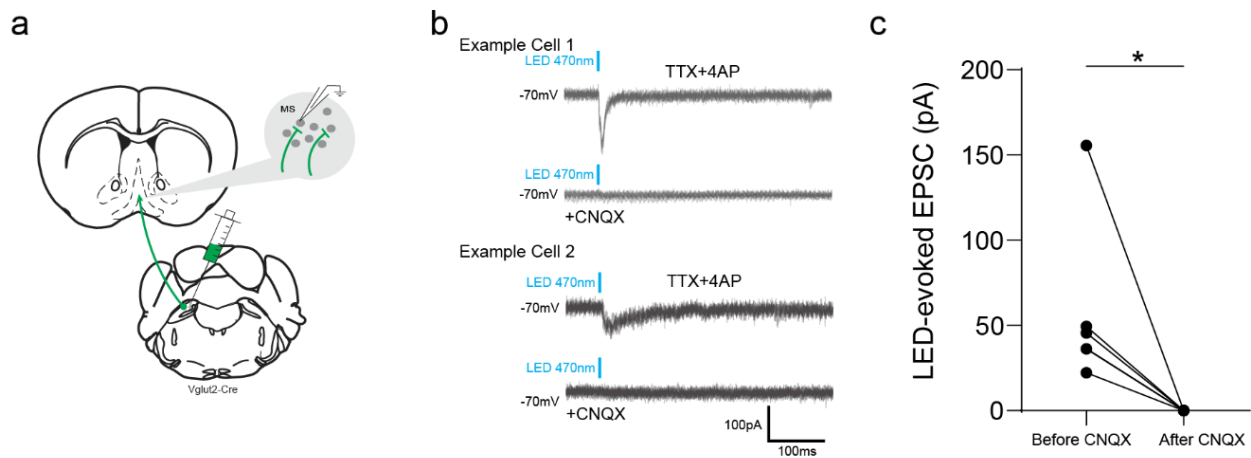

**Supplementary Figure 2 | AMPA-receptor mediated synaptic currents of the excitatory PBN-MS projection.**

**a**, Illustration of the experimental scheme. AAV-DIO-ChR2 was injected into PBN while in vitro brain slice recording was performed in MS. **b**, Two example neurons exhibited light-evoked inward synaptic currents recorded at -70mV in the presence of TTX and 4AP. Perfusion of CNQX completely blocked the currents. **c**, Amplitudes of light-evoked synaptic currents before and after CNQX application (n = 5). \*, p = 0.0002, ratio paired t test, two-sided. Source data are provided as a Source Data file.

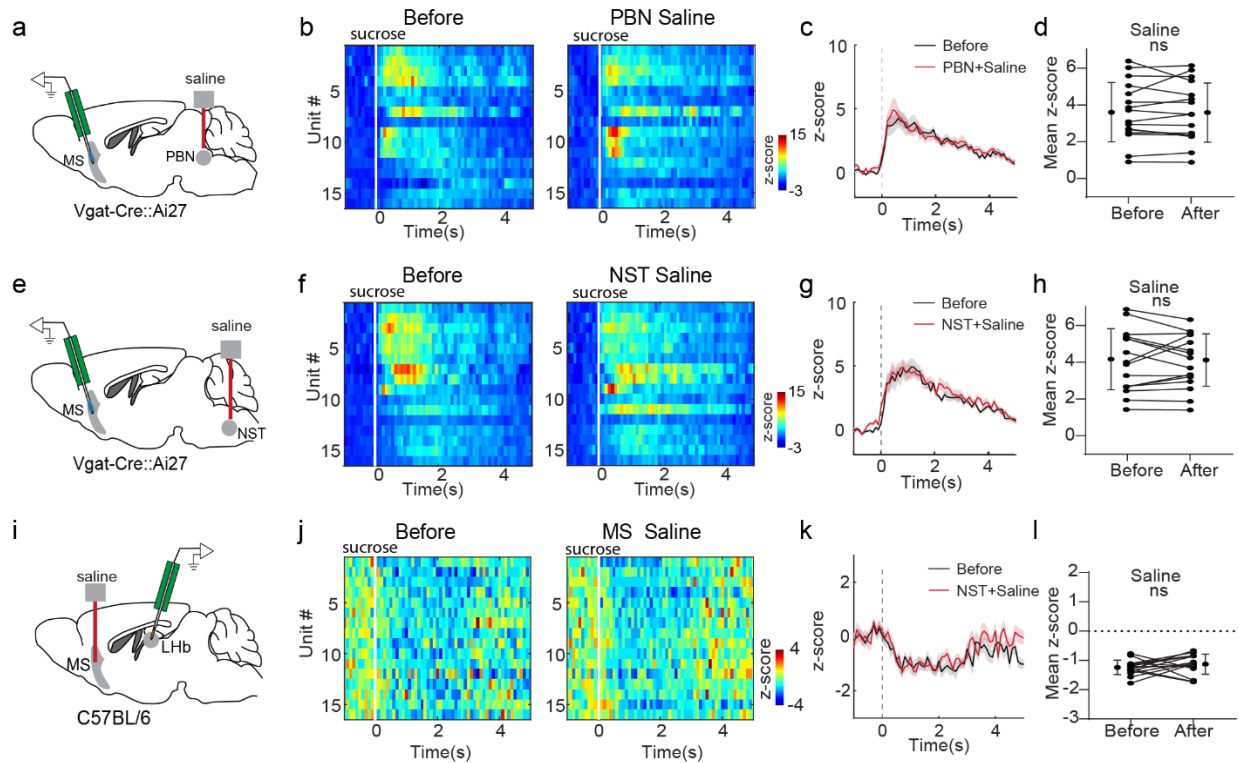

### Supplementary Figure 3 | Control experiments for silencing PBN, NST and MS.

**a**, Optrode recording from MS GABAergic neurons while infusing PBN with saline vehicle for muscimol. **b**, Heatmap plot of Z-score for sucrose responses of MS GABAergic neurons ( $n = 16$ ) before and after infusion of saline in PBN. **c**, Population average. All shades indicate s.e.m. **d**, Mean Z-score before and after infusing saline in PBN. Data points for the same neuron are connected with a line. “ns”, not significant,  $p = 0.6147$ , paired t test, two-sided. **e-h**, Infusing saline in NST. “ns”, not significant,  $p = 0.5867$ , paired t test, two-sided. **i-l**, Infusing saline in MS and recording from LHb neurons. “ns”, not significant,  $p = 0.3455$ , paired t test, two-sided. Source data are provided as a Source Data file.

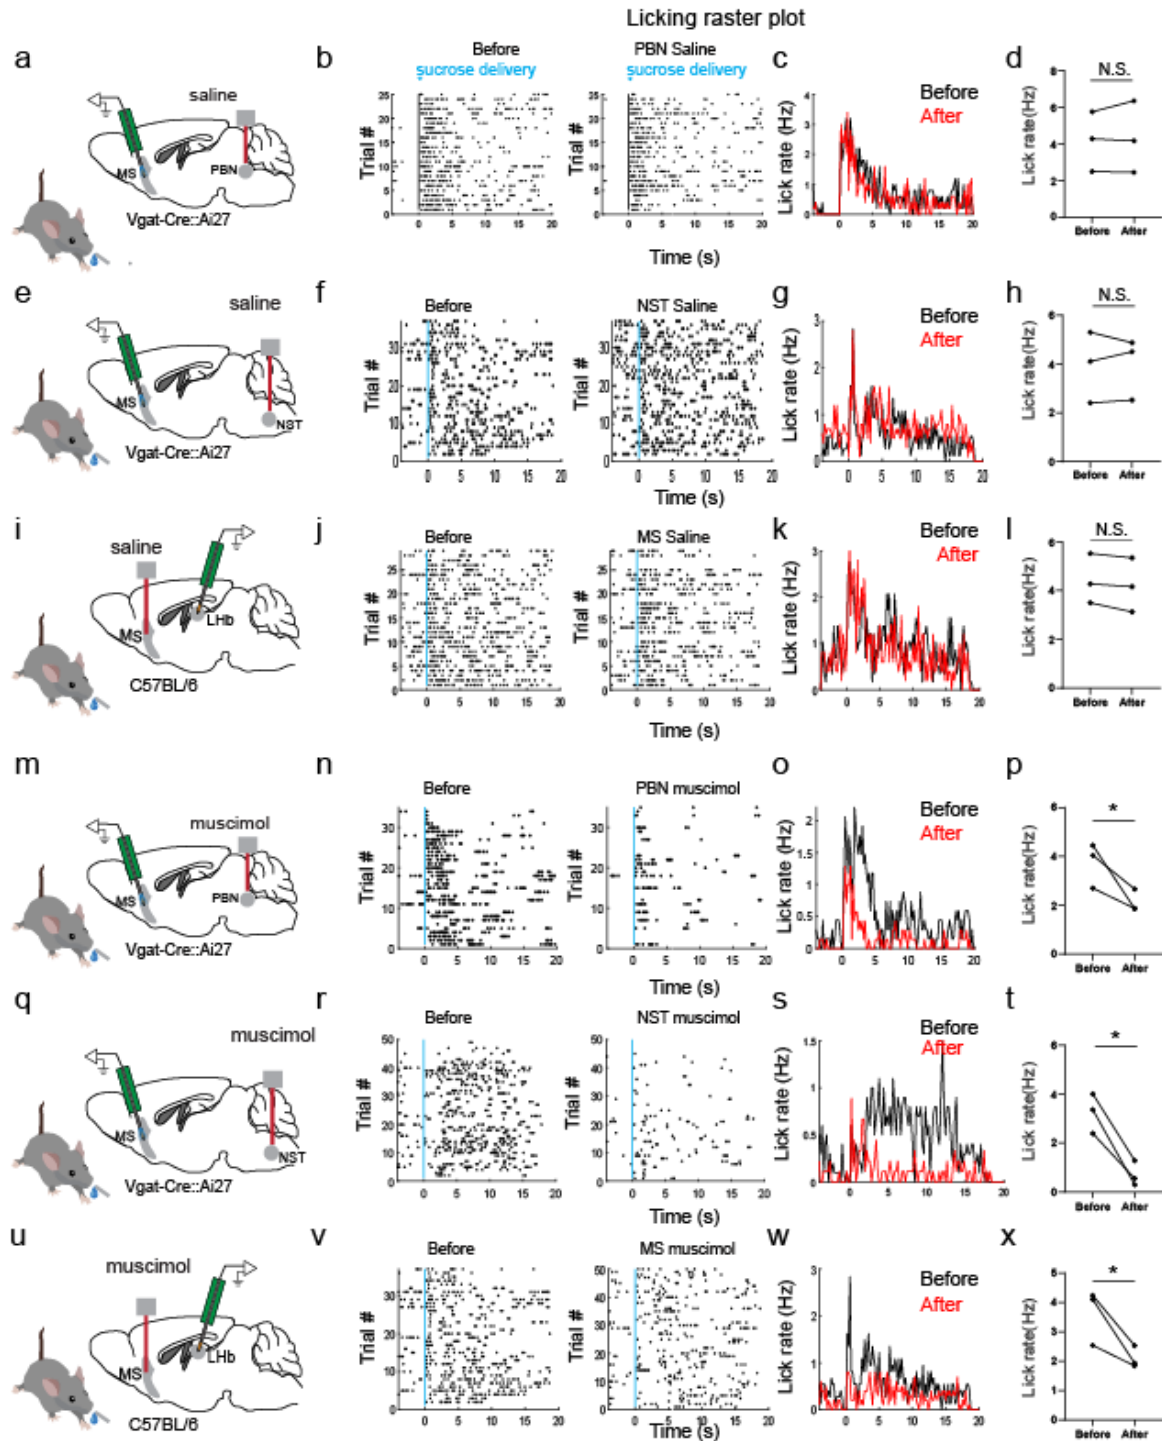

**Supplementary Figure 4 | Sucrose licking behavior in control and silencing experiments.**

**a**, Illustration of experimental scheme. Sucrose licking behavior was monitored when optrode recording was performed from MS GABAergic neurons. Saline was infused into PBN. **b**, Raster plot of licks to sucrose delivery before and after infusion of saline in PBN. **c**, Plot of lick rate before (in black) and after (in red) saline infusion. **d**, Mean lick rate before and after infusing saline in PBN. Data points for the same animal are connected with a line. N.S.,  $p = 0.2209$ , not significant, paired t test, two-sided. **e-h**, Infusing

saline into NST,  $p=0.9204$ , paired t test, two-sided. **i-l**, Infusing saline into MS,  $p=0.103$ , paired t test, two-sided. **m-p**, Lick rate before and after infusing muscimol into PBN. \*,  $p = 0.0479$ , paired t test, two-sided. **q-t**, Lick rate before and after infusing muscimol into NST. \*,  $p = 0.0199$ , paired t test, two-sided. **u-x**, Lick rate before and after infusing muscimol into MS. \*,  $p = 0.0476$ , paired t test, two-sided. Source data are provided as a Source Data file.

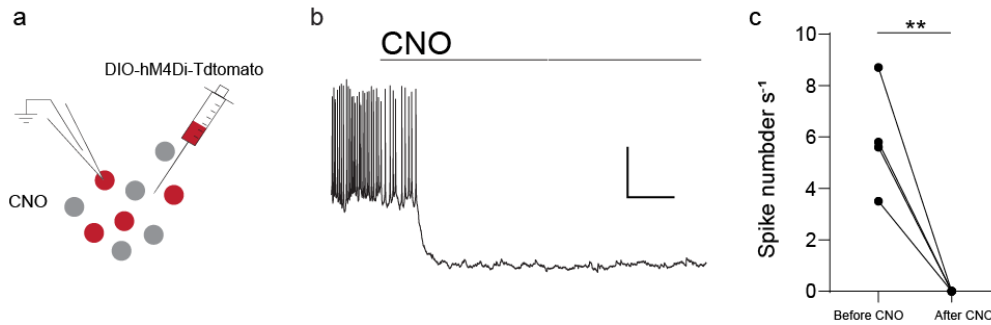

**Supplementary Figure 5 | Efficiency of chemogenetic silencing of hM4Di-expressing neurons in MS.**

**a**, Illustration of experimental scheme. Slice whole-cell recording was performed from neurons that expressed hM4Di (red). **b**, Example recorded trace showing that CNO application effectively suppressed spiking activity of an hM4Di-expressing MS neurons. Scale: 20mV, 5s. **c**, Mean spike rate (Hz) before and after CNO application. \*\*,  $p=0.0053$ , paired t test, one-sided. Source data are provided as a Source Data file.



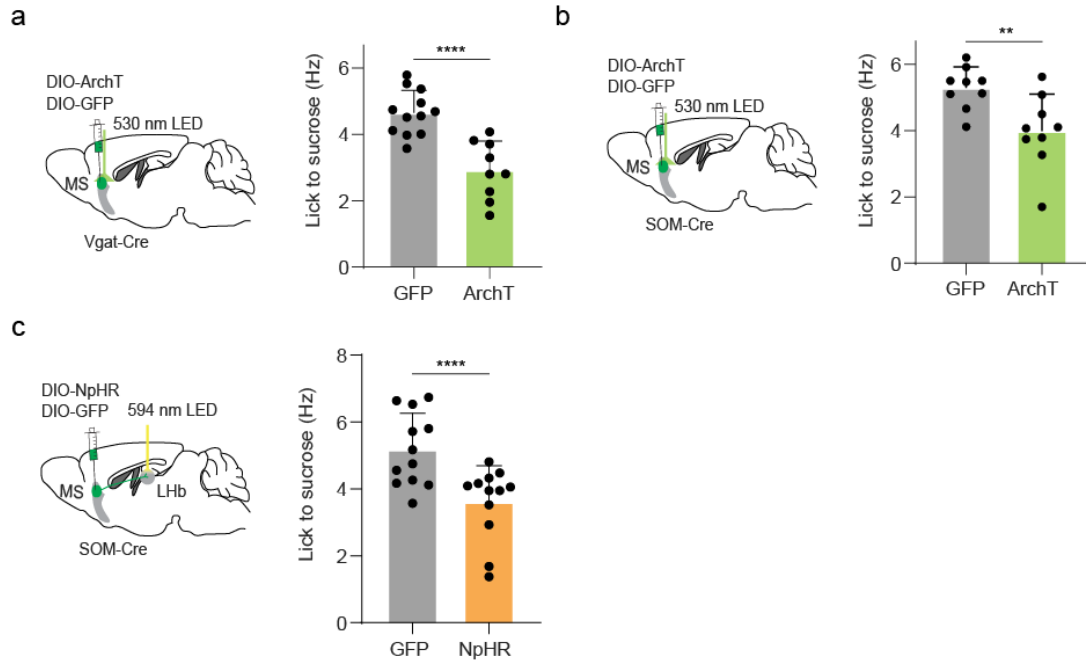

### Supplementary Figure 6 | Lick rates to sucrose in optogenetic silencing experiments.

**a**, Left, illustration of experimental scheme. Either ArchT or GFP was expressed in MS GABAergic neurons in Vgat-Cre mice, with the optic fiber been implanted to target MS to deliver 530nm LED light. Right, lick rates to sucrose delivery in GFP or ArchT expressing mice. \*\*\*\* $p < 0.0001$ , t test, two-sided. **b**, Either ArchT or GFP was expressed in MS of SOM-Cre mice. Right, lick rates to sucrose in GFP or ArchT expressing mice. \*\* $p = 0.0077$ , t test, two-sided. **c**, Either NpHR or GFP was expressed in MS of SOM-Cre mice, two-sided. Right, lick rates to sucrose in GFP or NpHR expressing mice. \*\*\*\* $p = 0.002$ , t test, two-sided. Source data are provided as a Source Data file.
